# Supplementary material
Source: publisher figshare collection journal article supplement (https://acs.figshare.com/ndownloader/files/7715836)
Supplement: Supplementary file 1 [file 7715836]

# A fragment profiling approach to inhibitors of the orphan *M. tuberculosis* P450 CYP144A1

Madeline E. Kavanagh,<sup>a</sup> Jude Chenge,<sup>b†</sup> Azedine Zoufir,<sup>a</sup> Kirsty J. McLean,<sup>b</sup> Anthony, G. Coyne,<sup>a</sup>  
Andreas Bender,<sup>a</sup> Andrew W. Munro<sup>b</sup> and Chris Abell<sup>a\*</sup>

<sup>a</sup>Department of Chemistry, University of Cambridge, Lensfield Road, Cambridge CB2 1EW, United Kingdom; <sup>b</sup>Centre for Synthetic Biology of Fine and Specialty Chemicals (SYNBIOCHEM), Manchester Institute of Biotechnology, School of Chemistry, The University of Manchester, Manchester M1 7DN, United Kingdom.

\*Corresponding author: Chris Abell, [ca26@cam.ac.uk](mailto:ca26@cam.ac.uk)

Keywords: fragment screening, ligand profile, cytochrome P450 enzyme, *Mycobacterium tuberculosis*, CYP144A1

## Supporting Information

|                                                                              |        |
|------------------------------------------------------------------------------|--------|
| Table S1. Fragment profile similarity scores from unbiased fragment library  | Pg. 2. |
| Table S2. Fragment similarity scores from heme focused fragment library      | Pg. 2. |
| Table S3. Substrates screening by UV-vis and biochemical assays.             | Pg. 4. |
| Figure S1. CYP144A1 ligands identified from a library of CYP121A1 inhibitors | Pg. 5. |
| Figure S2. Binding affinity titrations                                       | Pg. 6. |
| Figure S3. UV-vis competition assay for compound <b>3</b>                    | Pg. 7. |
| Figure S4. CPMG NMR screening and competition assay                          | Pg. 8. |

**Table S1.** Fragment profile similarity of *Mtb* cytochrome P450 enzymes determined from screening an unbiased, rule-of-three compliant fragment library by ligand-observed NMR. Profiles calculated to be significantly similar have been shaded grey.

| Enzyme 1 | Enzyme 2 | E-value | P-value |
|----------|----------|---------|---------|
| CYP121A1 | CYP144A1 | 3.0E-07 | 3.0E-07 |
| CYP125A1 | CYP142A1 | 3.7E-06 | 3.7E-06 |
| CYP124A1 | CYP142A1 | 5.6E-06 | 5.6E-06 |
| CYP124A1 | CYP125A1 | 3.1E-05 | 3.1E-05 |
| CYP121A1 | CYP125A1 | 7.6E-05 | 7.6E-05 |
| CYP121A1 | CYP124A1 | 2.2E-04 | 2.2E-04 |
| CYP142A1 | CYP126A1 | 2.4E-04 | 2.4E-04 |
| CYP124A1 | CYP144A1 | 3.0E-04 | 3.0E-04 |
| CYP121A1 | CYP126A1 | 4.3E-04 | 4.3E-04 |
| CYP124A1 | CYP126A1 | 5.4E-04 | 5.4E-04 |
| CYP121A1 | CYP143A1 | 6.0E-04 | 6.0E-04 |
| CYP125A1 | CYP126A1 | 9.2E-04 | 9.2E-04 |
| CYP125A1 | CYP144A1 | 1.6E-03 | 1.6E-03 |
| CYP121A1 | CYP142A1 | 2.3E-03 | 2.2E-03 |
| CYP142A1 | CYP144A1 | 4.9E-03 | 4.9E-03 |
| CYP144A1 | CYP143A1 | 5.4E-03 | 5.3E-03 |
| CYP144A1 | CYP126A1 | 6.9E-03 | 6.9E-03 |
| CYP125A1 | CYP143A1 | 1.5E-02 | 1.5E-02 |
| CYP126A1 | CYP143A1 | 4.4E-02 | 4.3E-02 |
| CYP142A1 | CYP143A1 | 4.5E-02 | 4.4E-02 |
| CYP124A1 | CYP143A1 | 6.6E-02 | 6.4E-02 |

**Table S2.** Fragment profile similarity of *Mtb* cytochrome P450 enzymes determined from screening a focused library of heme-binding fragments by UV-vis spectroscopy. Profiles calculated to be significantly similar have been shaded grey.

| Enzyme 1         | Enzyme 2         | E-value | P-value |
|------------------|------------------|---------|---------|
| CYP102A1 HD WT   | CYP102A1 HD A82F | 8.2E-07 | 8.2E-07 |
| CYP142A1         | CYP102A1 HD A82F | 9.3E-06 | 9.3E-06 |
| CYP124A1         | CYP142A1         | 8.6E-05 | 8.6E-05 |
| CYP142A1         | CYP102A1 HD WT   | 1.6E-04 | 1.6E-04 |
| CYP124A1         | CYP105AS1        | 1.7E-04 | 1.7E-04 |
| CYP152L1         | CYP105AS1        | 7.5E-04 | 7.5E-04 |
| CYP121A1         | CYP126A1         | 1.5E-03 | 1.5E-03 |
| CYP102A1 HD WT   | CYP105AS1        | 1.8E-03 | 1.8E-03 |
| CYP124A1         | CYP102A1 HD A82F | 1.8E-03 | 1.8E-03 |
| CYP125A1         | CYP144A1         | 2.5E-03 | 2.5E-03 |
| CYP142A1         | CYP152L1         | 2.9E-03 | 2.8E-03 |
| CYP124A1         | CYP152L1         | 3.0E-03 | 3.0E-03 |
| CYP102A1 HD A82F | CYP105AS1        | 3.5E-03 | 3.5E-03 |

|                  |                  |         |         |
|------------------|------------------|---------|---------|
| CYP121A1         | CYP144A1         | 3.8E-03 | 3.7E-03 |
| CYP124A1         | CYP102A1 HD WT   | 3.8E-03 | 3.7E-03 |
| CYP125A1         | CYP126A1         | 5.3E-03 | 5.3E-03 |
| CYP125A1         | CYP143A1         | 5.3E-03 | 5.3E-03 |
| CYP102A1 HD WT   | CYP152L1         | 5.9E-03 | 5.9E-03 |
| CYP126A1         | CYP142A1         | 6.0E-03 | 5.9E-03 |
| CYP142A1         | CYP143A1         | 6.0E-03 | 5.9E-03 |
| CYP142A1         | CYP105AS1        | 6.5E-03 | 6.5E-03 |
| CYP102A1 HD A82F | CYP152L1         | 9.9E-03 | 9.8E-03 |
| CYP124A1         | CYP143A1         | 1.2E-02 | 1.2E-02 |
| CYP124A1         | CYP125A1         | 1.2E-02 | 1.2E-02 |
| CYP143A1         | CYP105AS1        | 1.6E-02 | 1.6E-02 |
| CYP143A1         | CYP102A1 HD A82F | 2.0E-02 | 2.0E-02 |
| CYP126A1         | CYP152L1         | 2.5E-02 | 2.5E-02 |
| CYP143A1         | CYP152L1         | 2.5E-02 | 2.5E-02 |
| CYP125A1         | CYP142A1         | 2.6E-02 | 2.6E-02 |
| CYP125A1         | CYP102A1 HD A82F | 2.8E-02 | 2.8E-02 |
| CYP126A1         | CYP102A1 HD WT   | 3.0E-02 | 3.0E-02 |
| CYP143A1         | CYP102A1 HD WT   | 3.0E-02 | 3.0E-02 |
| CYP126A1         | CYP143A1         | 3.1E-02 | 3.0E-02 |
| CYP121A1         | CYP125A1         | 3.3E-02 | 3.2E-02 |
| CYP121A1         | CYP124A1         | 3.3E-02 | 3.2E-02 |
| CYP125A1         | CYP102A1 HD WT   | 3.7E-02 | 3.6E-02 |
| CYP121A1         | CYP152L1         | 5.4E-02 | 5.3E-02 |
| CYP126A1         | CYP102A1 HD A82F | 5.8E-02 | 5.6E-02 |
| CYP124A1         | CYP126A1         | 5.9E-02 | 5.8E-02 |
| CYP121A1         | CYP102A1 HD WT   | 6.1E-02 | 6.0E-02 |
| CYP121A1         | CYP142A1         | 6.2E-02 | 6.0E-02 |
| CYP125A1         | CYP152L1         | 6.3E-02 | 6.1E-02 |
| CYP126A1         | CYP105AS1        | 6.9E-02 | 6.7E-02 |
| CYP126A1         | CYP144A1         | 8.1E-02 | 7.8E-02 |
| CYP143A1         | CYP144A1         | 8.1E-02 | 7.8E-02 |
| CYP121A1         | CYP102A1 HD A82F | 8.6E-02 | 8.3E-02 |
| CYP125A1         | CYP105AS1        | 8.8E-02 | 8.4E-02 |
| CYP121A1         | CYP143A1         | 9.6E-02 | 9.2E-02 |
| CYP124A1         | CYP144A1         | 1.0E-01 | 9.7E-02 |
| CYP144A1         | CYP105AS1        | 1.1E-01 | 1.0E-01 |
| CYP144A1         | CYP152L1         | 1.2E-01 | 1.1E-01 |
| CYP121A1         | CYP105AS1        | 1.2E-01 | 1.2E-01 |
| CYP142A1         | CYP144A1         | 1.2E-01 | 1.2E-01 |
| CYP144A1         | CYP102A1 HD WT   | 1.4E-01 | 1.3E-01 |
| CYP144A1         | CYP102A1 HD A82F | 1.5E-01 | 1.4E-01 |

**Table S3. Potential substrates screened against *Mtb* CYP144A1 using UV-vis spectroscopy and in biochemical assays.** The protocol for UV-vis screening is described in the main paper. Biochemical assays were performed according to the previously reported procedure, (Driscoll *et al.*, *J. Biol. Chem.* **2010**, 285:38270–38282) using 1 mM compounds, 0.5  $\mu$ M CYP144A1 in 50 mM KPi (pH 7.0), 10  $\mu$ M spinach ferredoxin, 10  $\mu$ M spinach ferredoxin reductase, 1 mM NADPH and an internal NADPH regenerating system of glucose-6-phosphate/glucose-6-phosphate dehydrogenase. Control assays omitting CYP144A1 were also run.

Indazole **1** was the only compound to produce type I perturbations in the optical spectrum of CYP144A1. No oxidation products were detected for any compounds in LCMS traces.

| Compounds analyzed by UV-vis and in biochemical assays |                    |               |
|--------------------------------------------------------|--------------------|---------------|
| Indazole <b>1</b>                                      |                    |               |
| Cholesterol                                            | Myristic acid      | D-sphingosine |
| Cholestenone                                           | Pentadecanoic acid | D-glucose     |
| Testosterone                                           | Palmitoleic acid   | D-mannose     |
| Vitamin D                                              | Arachidonic acid   | D-fructose    |
| Phytanic acid                                          | Parinaric acid     | Maltose       |
| Biotin                                                 | Arachidic acid     | Galactose     |
| Vitamin K                                              | Tridecanoic acid   | starch        |

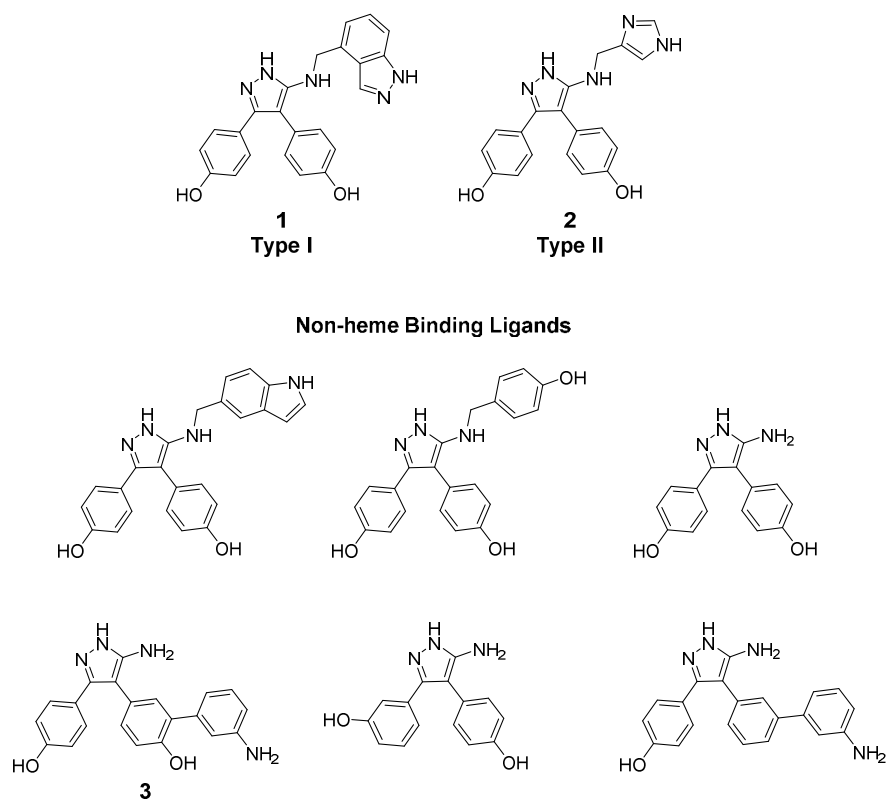

**Figure S1.** CYP144A1 ligands that were identified from a library of CYP121A1 inhibitors.

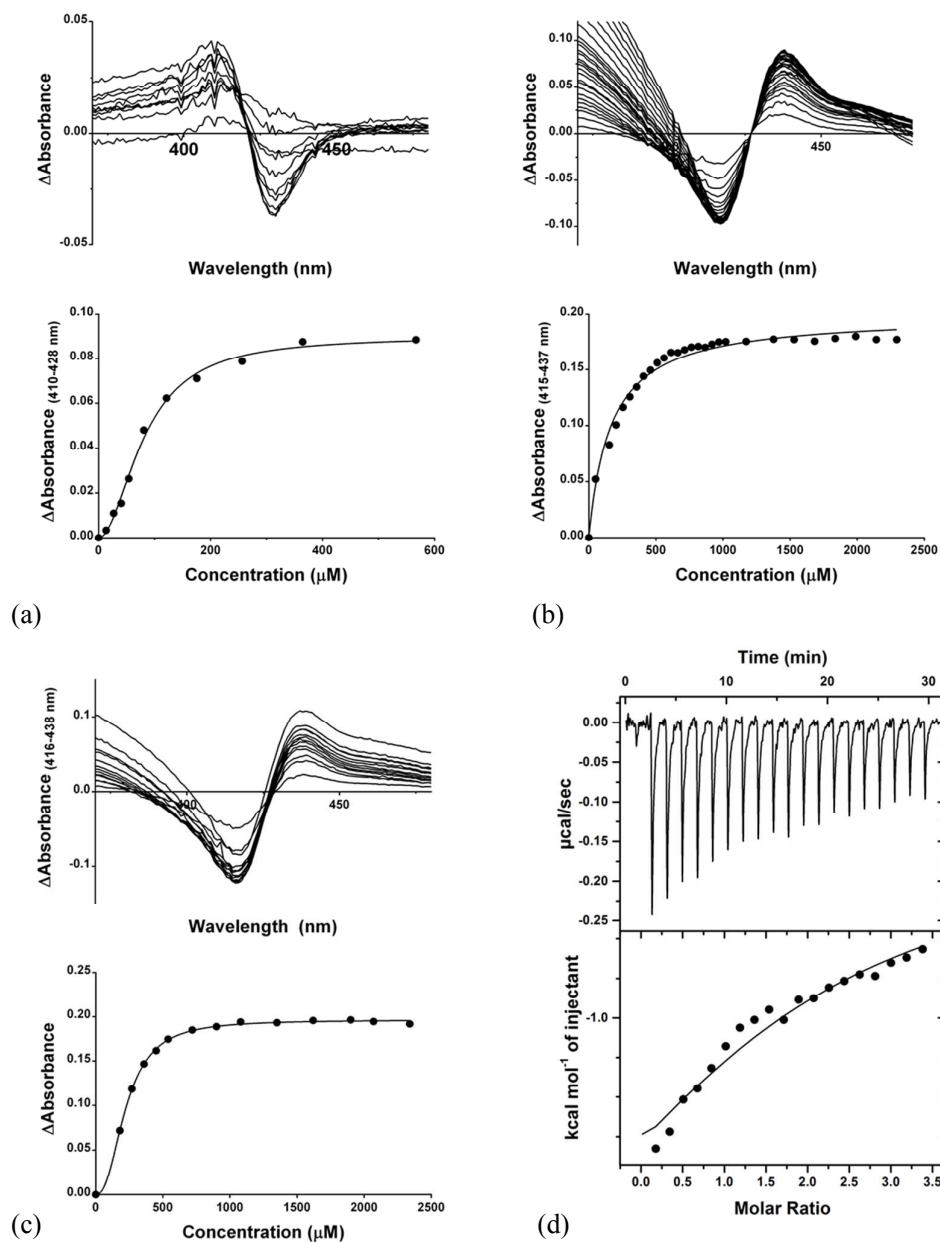

**Figure S2.** Binding affinity titrations. (a-c) Difference spectra (top panels) and concentration dependent change in absorbance (bottom panels) from the titration of CYP144A1 (60  $\mu\text{M}$ ) with (a) compound 1, (b) compound 2, and (c) compound 4. Data were fitted using the Hill equation for compound 1 ( $h = 1.8$ ) and 4 ( $h = 2.4$ ), or a hyperbolic function for compound 2. (d) ITC binding isotherm for the titration of CYP144A1 (60  $\mu\text{M}$ ) with compound 3 (1 mM). The residual heat of ligand dilution was subtracted as a constant value. The integrated enthalpy change was fitted using a one-site binding model setting  $N = 2$ .

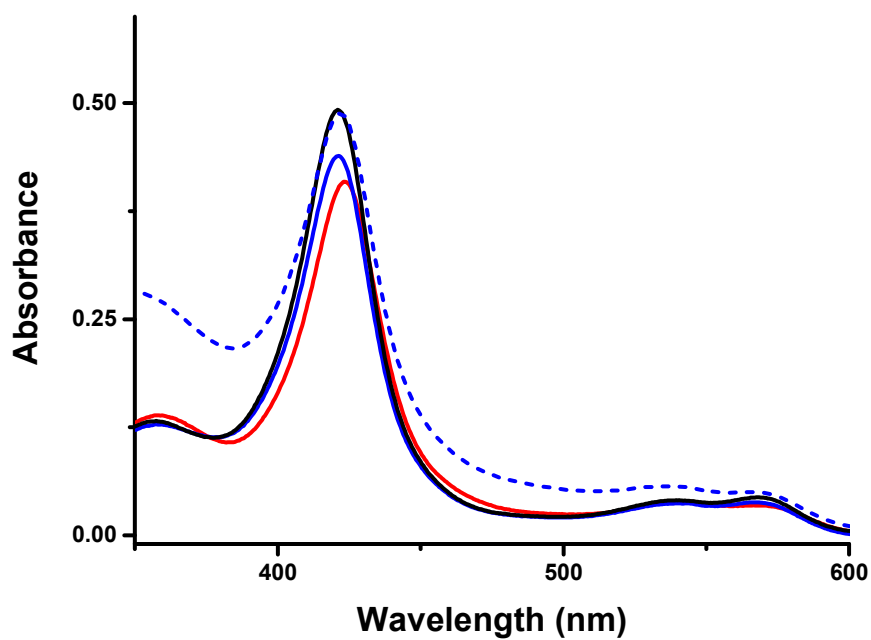

**Figure S3.** Competitive binding of compound **3** and econazole to CYP144A1. The Soret  $\lambda_{\text{max}}$  of the ligand-free CYP144A1 (black spectrum) at 421.0 nm is not affected by compound **3** (100  $\mu\text{M}$ , blue spectrum). Econazole (50  $\mu\text{M}$ , red spectrum) caused the Soret  $\lambda_{\text{max}}$  to red-shift to 423.5 nm, and the addition of compound **3** (50  $\mu\text{M}$ , blue dashed spectrum) reduced this shift to 422.0 nm.

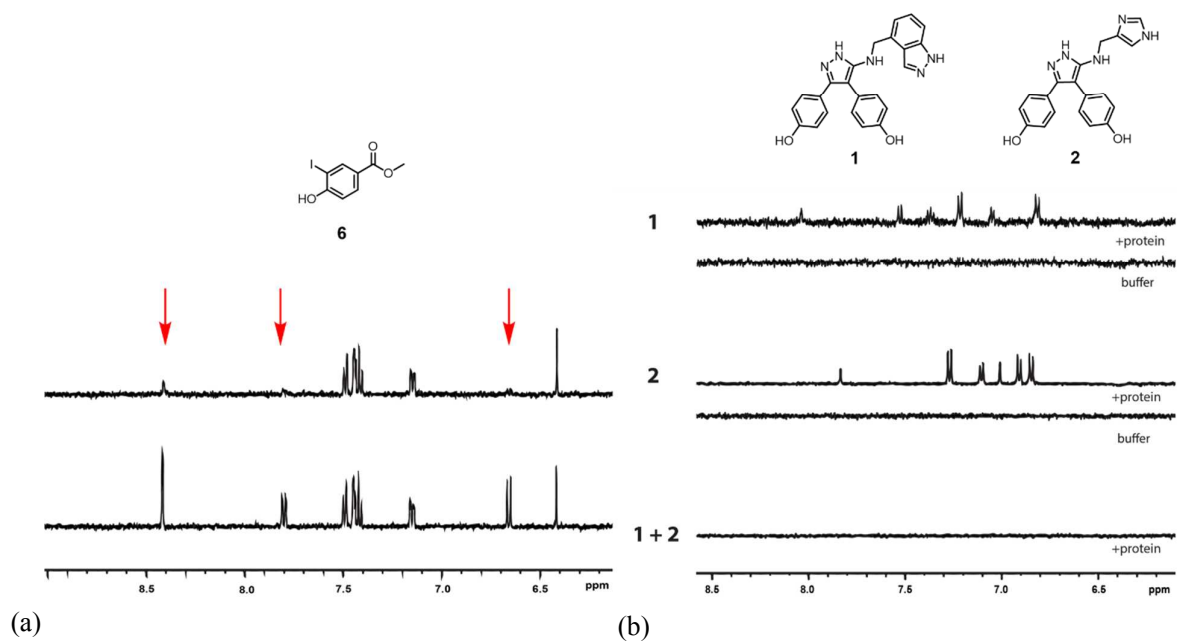

**Figure S4.** Ligand-observed NMR screening and binding mode characterization. (a) CPMG spectra of a cocktail of 3 fragments (each 200 μM) in buffer (bottom spectrum) and in the presence of CYP144A1 (20 μM) (top spectrum). Red arrows indicate proton signals corresponding to the fragment hit identified as methyl 4-hydroxy-3-iodobenzoate **5**. (b) CPMG spectra of compound **1** (200 μM) and compound **2** (200 μM) tested independently in buffer and with CYP144A1 (20 μM) (top and middle sets of spectra); and also compound **1** and **2** tested in competition in the presence of CYP144A1 (20 μM) (bottom spectrum).
